# Supplementary material for: Experimental observation of spin delocalisation onto the aryl-alkynyl ligand in the complexes [Mo(CCAr)(Ph2PCH2CH2PPh2)(η-C7H7)]+ (Ar = C6H5, C6H4-4-F; C7H7 = cycloheptatrienyl): an EPR and ENDOR investigation
Source: Royal Society of Chemistry journal article supplement (doi:10.1039/c0dt00642d), 2010-01-01
Supplement: c0dt00642d.pdf [file c0dt00642d.pdf]

**Experimental Observation of Spin Delocalisation onto the Aryl-  
Alkynyl Ligand in the Complexes**

**$[\text{Mo}(\text{C}\equiv\text{CAr})(\text{Ph}_2\text{PCH}_2\text{CH}_2\text{PPh}_2)(\eta\text{-C}_7\text{H}_7)]^+$  (Ar = C<sub>6</sub>H<sub>5</sub>, C<sub>6</sub>H<sub>4</sub>-4-F;  
C<sub>7</sub>H<sub>7</sub> = Cycloheptatrienyl): an EPR and ENDOR Investigation.**

**Emma Carter<sup>a</sup>, David Collison<sup>b,\*</sup>, Ruth Edge<sup>b</sup>, Emma C. Fitzgerald<sup>c</sup>, Hannah N.  
Lancashire<sup>c</sup>, Damien M. Murphy<sup>a,\*</sup>, Joseph J.W. McDouall<sup>c</sup>, Joseph Sharples<sup>c</sup> and  
Mark W. Whiteley<sup>c,\*</sup>**

*<sup>a</sup>School of Chemistry, Cardiff University, Main Building, Park Place, Cardiff, UK CF10  
3AT, UK*

*<sup>b</sup>EPSRC National Service for EPR Spectroscopy, School of Chemistry, University of  
Manchester, Manchester, M13 9PL, UK*

*<sup>c</sup>School of Chemistry, University of Manchester, Manchester, M13 9PL, UK*

**SUPPLEMENTARY DATA**

|                                |                   |
|--------------------------------|-------------------|
| <b>CW X-band ENDOR spectra</b> | <b>(Figs 1-2)</b> |
| <b>CW Q-band ENDOR spectra</b> | <b>(Fig 3)</b>    |
| <b>Pulsed X-band EPR/ENDOR</b> | <b>(Figs 4-5)</b> |

## Further details of EPR/ENDOR measurements

Details of the X-band cw EPR/ENDOR spectra were given in the main paper. Further pulsed (X-band) and cw (Q-band) measurements were also performed, and the details are given below:

*Q-band cw EPR/ENDOR*; measurements were performed on a Bruker ESP 300e series spectrometer using a Bruker ER5106QT resonator employing 12 dB RF power from a 3200L RF amplifier, 250 kHz RF modulation depth and 150  $\mu$ W power. The ENDOR measurements were performed at 10 K (EPR measurements at 50 K).

*X-band Pulsed EPR/ENDOR*: All pulse-EPR spectra were recorded on a Bruker E580 Eleksys spectrometer (MW = 9.73 GHz) equipped with a liquid Helium cryostat from Oxford Inc. The spectra were taken at 40 K.

Electron-spin-echo (ESE)-detected EPR: The experiments were carried out with the pulse sequence  $\pi/2$ - $\pi$ - $\tau$ -*echo*, with pulse lengths  $t_{\pi/2} = 16$  ns and  $t_{\pi} = 32$  ns, and a  $\tau$  value of 400ns.

Pulsed ENDOR: Pulsed Mims  $^1\text{H}$ -ENDOR spectra were recorded (at a field position of 3478 G) on a Bruker E580 spectrometer (microwave frequency 9.73 GHz) equipped with a liquid helium cryostat from Oxford Inc. The experiments were carried out with the pulse sequence  $\pi/2$ - $\tau$ - $\pi/2$ - $T$ - $\pi/2$ - $\tau$ -*echo* with microwave pulse length  $t_{\pi/2} = 16$  ns and an interpulse delay time  $\tau$  ranging from 128 - 1000 ns. An rf pulse of variable frequency and a length of 10  $\mu$ s was applied during a time interval T of 12  $\mu$ s.

### cw X-band ENDOR spectra

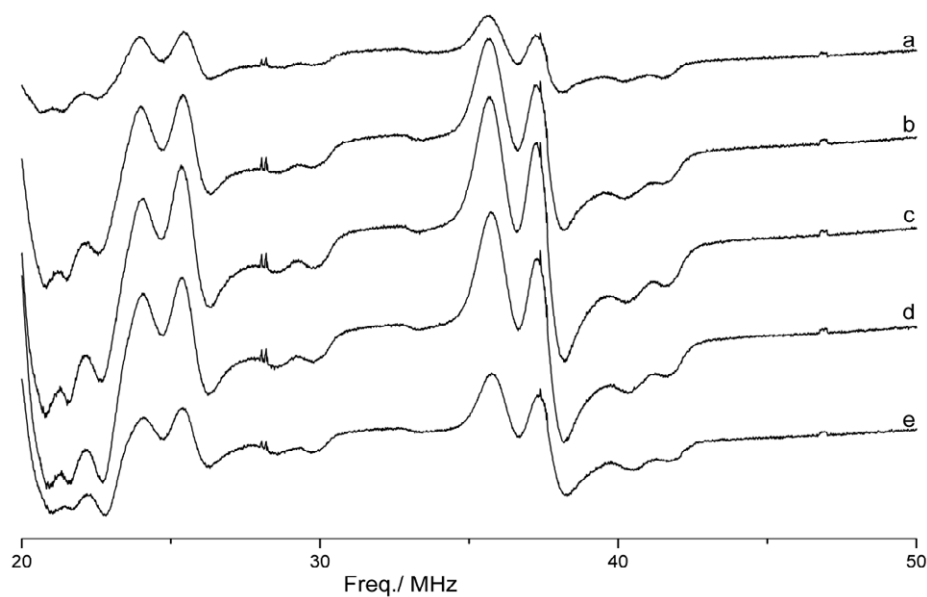

**Figure 1:**  $^{31}\text{P}$  ENDOR spectra [10 K] of  $[\mathbf{4}]^+$  recorded at magnetic field position (a) 3390 G, (b) 3413 G, (c) 3422 G, (d) 3431 G and (e) 3454 G. As expected no orientation selectivity observed, owing to the low  $g$  anisotropy, and dominant s character in the  $^{31}\text{P}$  coupling.

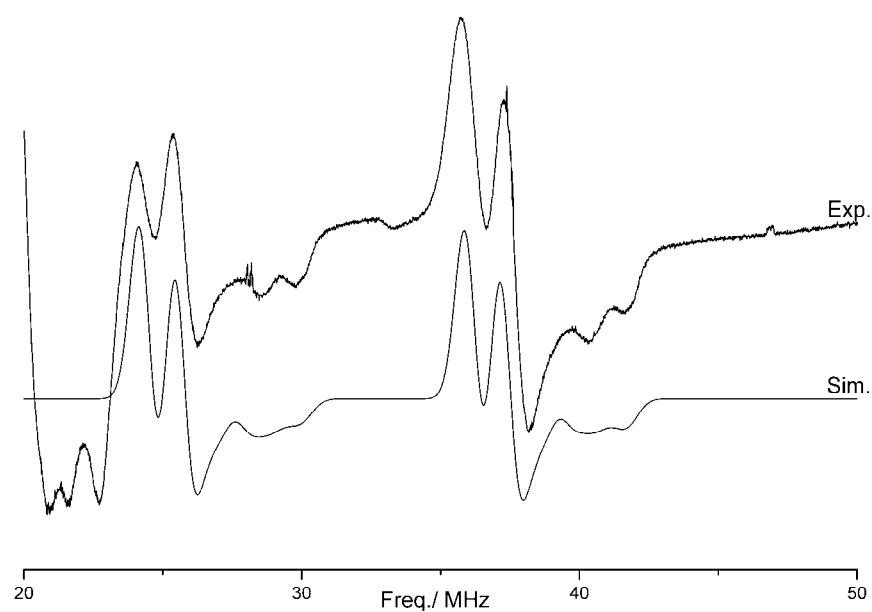

**Figure 2;** Experimental and simulated X-band  $^{31}\text{P}$  ENDOR spectrum of  $[\mathbf{4}]^+$  (recorded at a magnetic field position of 3413 G). The simulation was obtained using the parameters;  
 $^{31}\text{P}_a$  ;  $A_1 = 63$ ,  $A_2 = 63$ ,  $A_3 = 71.8$  MHz;  
 $^{31}\text{P}_b$  ;  $A_1 = 60.5$ ,  $A_2 = 60.5$ ,  $A_3 = 69.3$  MHz;  
where  $\text{P}_{a,b}$  represent the two slightly inequivalent  $^{31}\text{P}$  nuclei.  $\theta_H$  was defined as  $90^\circ$  in both cases.

### cw Q-band ENDOR spectra

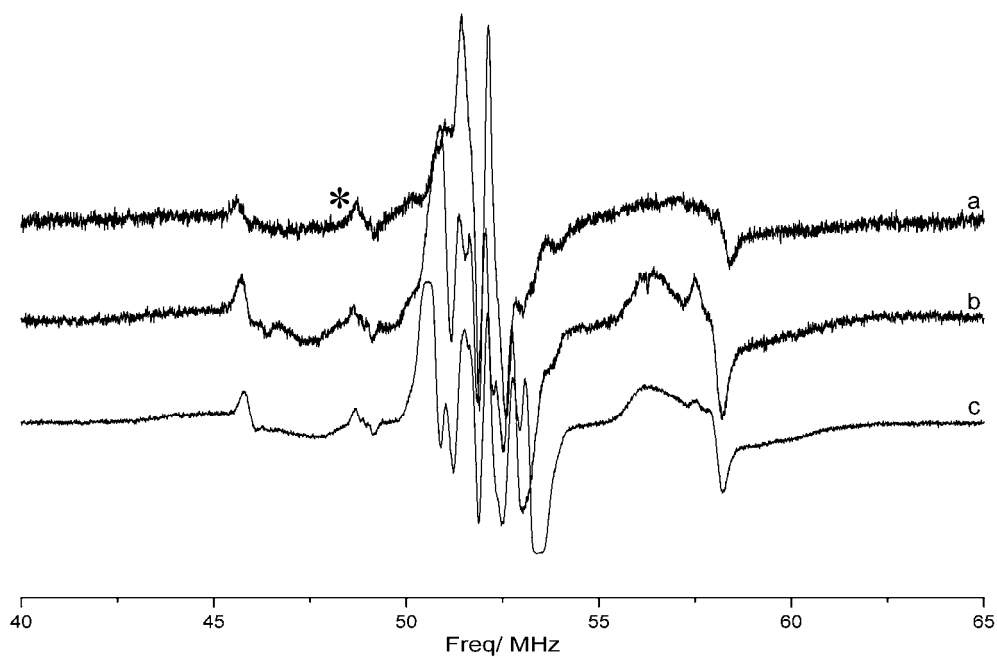

**Figure 3:** Q-band  $^1\text{H}$  ENDOR spectra [50 K] of (a)  $[4]^+$ , (b)  $[1]^+$  and (c)  $[5]^+$  recorded at 12264.2 G (employing a 250 kHz RF modulation). \* =  $^{19}\text{F}$  from  $\text{BF}_4$ . Note the unusual line shape of the cycloheptatrienyl ring protons. These were very broad and poorly resolved at 10 K (see Figure 7 in main paper).

## Pulsed X-band EPR/ENDOR

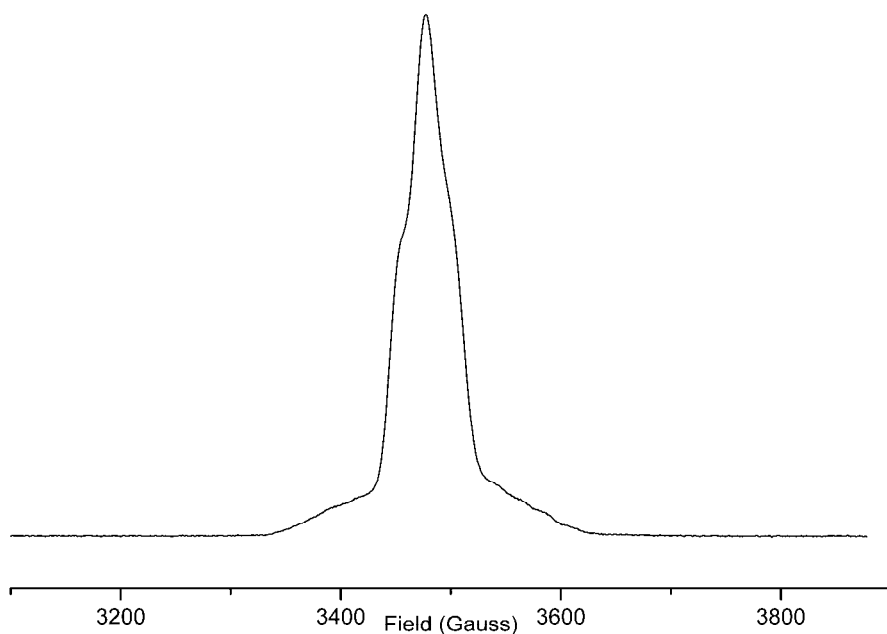

**Figure 4:** X-band FSE-detected EPR spectrum of  $[4]^+$  recorded at 40 K. The spectra were obtained with a standard 2-pulse sequence,  $\pi/2 - \pi - \tau - echo$ , with integration of the echo.

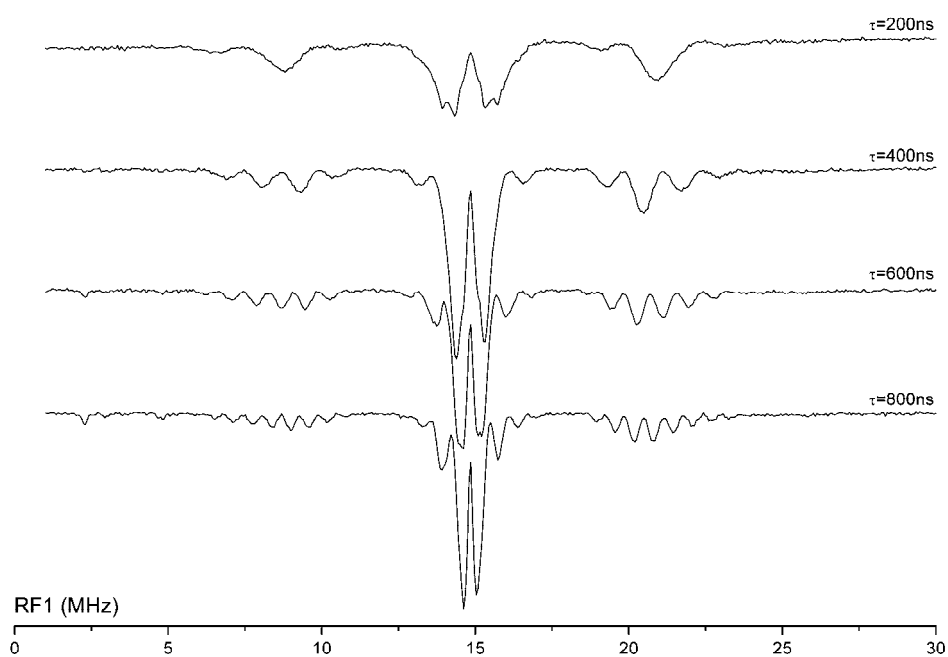

**Figure 5:** Mims ENDOR spectra (40K) recorded for different values of tau for  $[4]^+$ .
